# Supplementary material for: The structure of ORC–Cdc6 on an origin DNA reveals the mechanism of ORC activation by the replication initiator Cdc6
Source: PubMed Central journal article supplement (PMC8222357; doi:10.1038/s41467-021-24199-1), 2021-06-23
Supplement: 41467_2021_24199_MOESM1_ESM.pdf [file 41467_2021_24199_MOESM1_ESM.pdf]

## **Supplementary Information**

*The structure of ORC–Cdc6 on an Origin DNA Reveals the Mechanism of ORC Activation by the Replication Initiator Cdc6*

*By Feng et al.*

This document contains:

Supplemental Table 1

Supplemental Figures 1 – 7

**Supplementary Table 1. Cryo-EM data collection, refinement, and validation statistics for the yeast ORC–Cdc6–DNA complex**

|                                                     | ORC–Cdc6–DNA<br>(EMD-23818) | ORC–Cdc6–DNA<br>(EMDB-23755, PDB<br>7MCA) |
|-----------------------------------------------------|-----------------------------|-------------------------------------------|
| <b>Data collection and processing</b>               |                             |                                           |
| Microscope                                          | FEI Titan Krios             | FEI Titan Krios                           |
| Voltage (kV)                                        | 300                         | 300                                       |
| Electron exposure (e <sup>-</sup> Å <sup>-2</sup> ) | 60                          | 76                                        |
| Defocus range (μm)                                  | -1.0 – -2.0                 | -1.0 – -2.0                               |
| Pixel size (Å)                                      | 0.828                       | 0.828                                     |
| Symmetry imposed                                    | C1                          | C1                                        |
| Initial particle images (no.)                       | 419,781                     | 177,397                                   |
| Final particle images (no.)                         | 264,117(combined)           | 72,846                                    |
| Map resolution (Å)                                  | 3.3                         | 3.6                                       |
| FSC threshold                                       | 0.143                       | 0.143                                     |
| Map resolution range (Å)                            | 43–3.3                      | 43–3.6                                    |
| <b>Refinement</b>                                   |                             |                                           |
| Map sharpening B factor (Å)                         | -118.9                      | -118.5                                    |
| Model composition                                   |                             |                                           |
| Non-hydrogen atoms                                  |                             | 24,693                                    |
| Protein residues                                    |                             | 2,760                                     |
| Nucleotide                                          |                             | 100                                       |
| <b>R.m.s. deviations</b>                            |                             |                                           |
| Bond lengths (Å)                                    |                             | 0.007                                     |
| Bond angles (°)                                     |                             | 0.961                                     |
| <b>Validation</b>                                   |                             |                                           |
| MolProbity score                                    |                             | 1.83                                      |
| Clashscore                                          |                             | 6.04                                      |
| Poor rotamers (%)                                   |                             | 0.47                                      |
| <b>Ramachandran plot</b>                            |                             |                                           |
| Favored (%)                                         |                             | 91.69                                     |
| Allowed (%)                                         |                             | 8.31                                      |
| Outliers (%)                                        |                             | 0                                         |

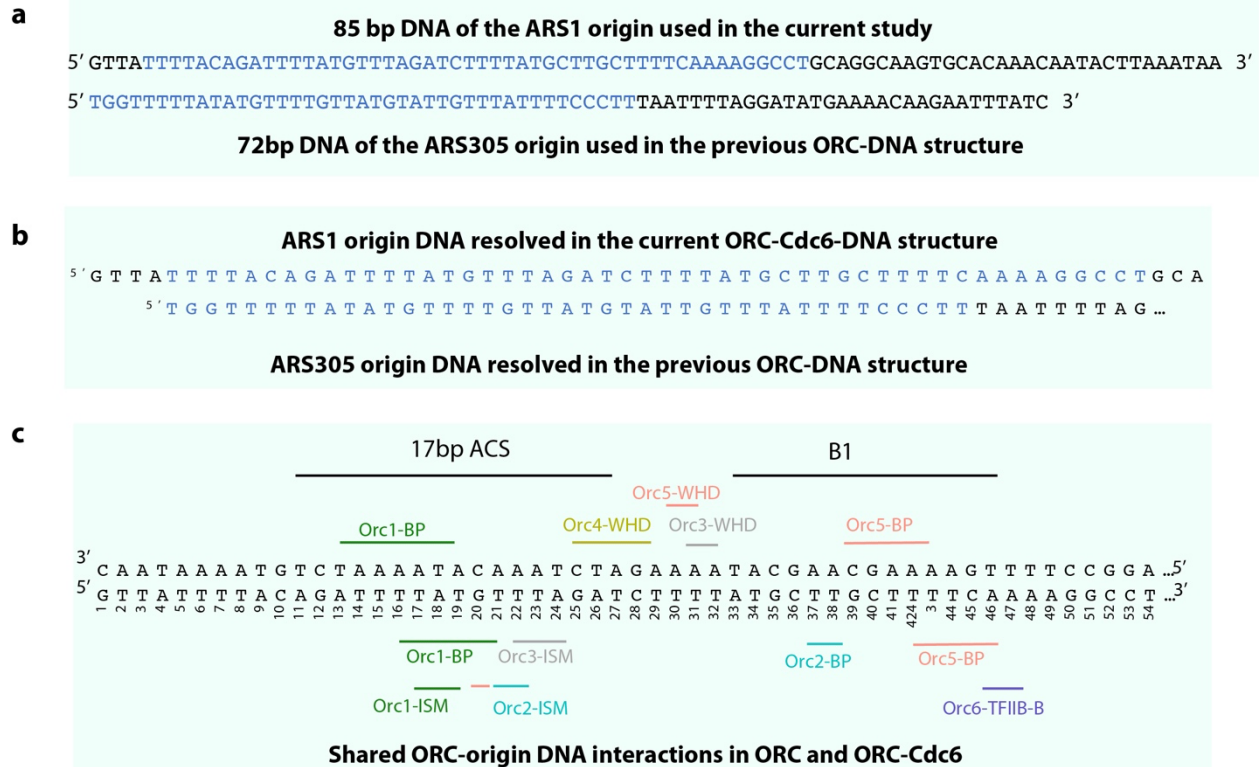

**Supplementary Figure 1. *ARS1* origin DNA used in the current study compared with the *ARS305* origin DNA used in the previous ORC–DNA structural study. a) The 85-bp DNA sequence used in current ORC–Cdc6–DNA study as compared to the 72-bp ARS305 DNA used in ORC–DNA structure <sup>60</sup>. The observed sequence in the structures are shown in blue. b) Alignment of the two origin DNAs by superimposing their respective ORC structures. c) The shared protein–DNA interaction regions between ORC and the ORC–Cdc6 structure are marked. This comparison reveals a set of consensus ORC binding sites in the two distinct origins (*ARS1* and *ARS305*).**

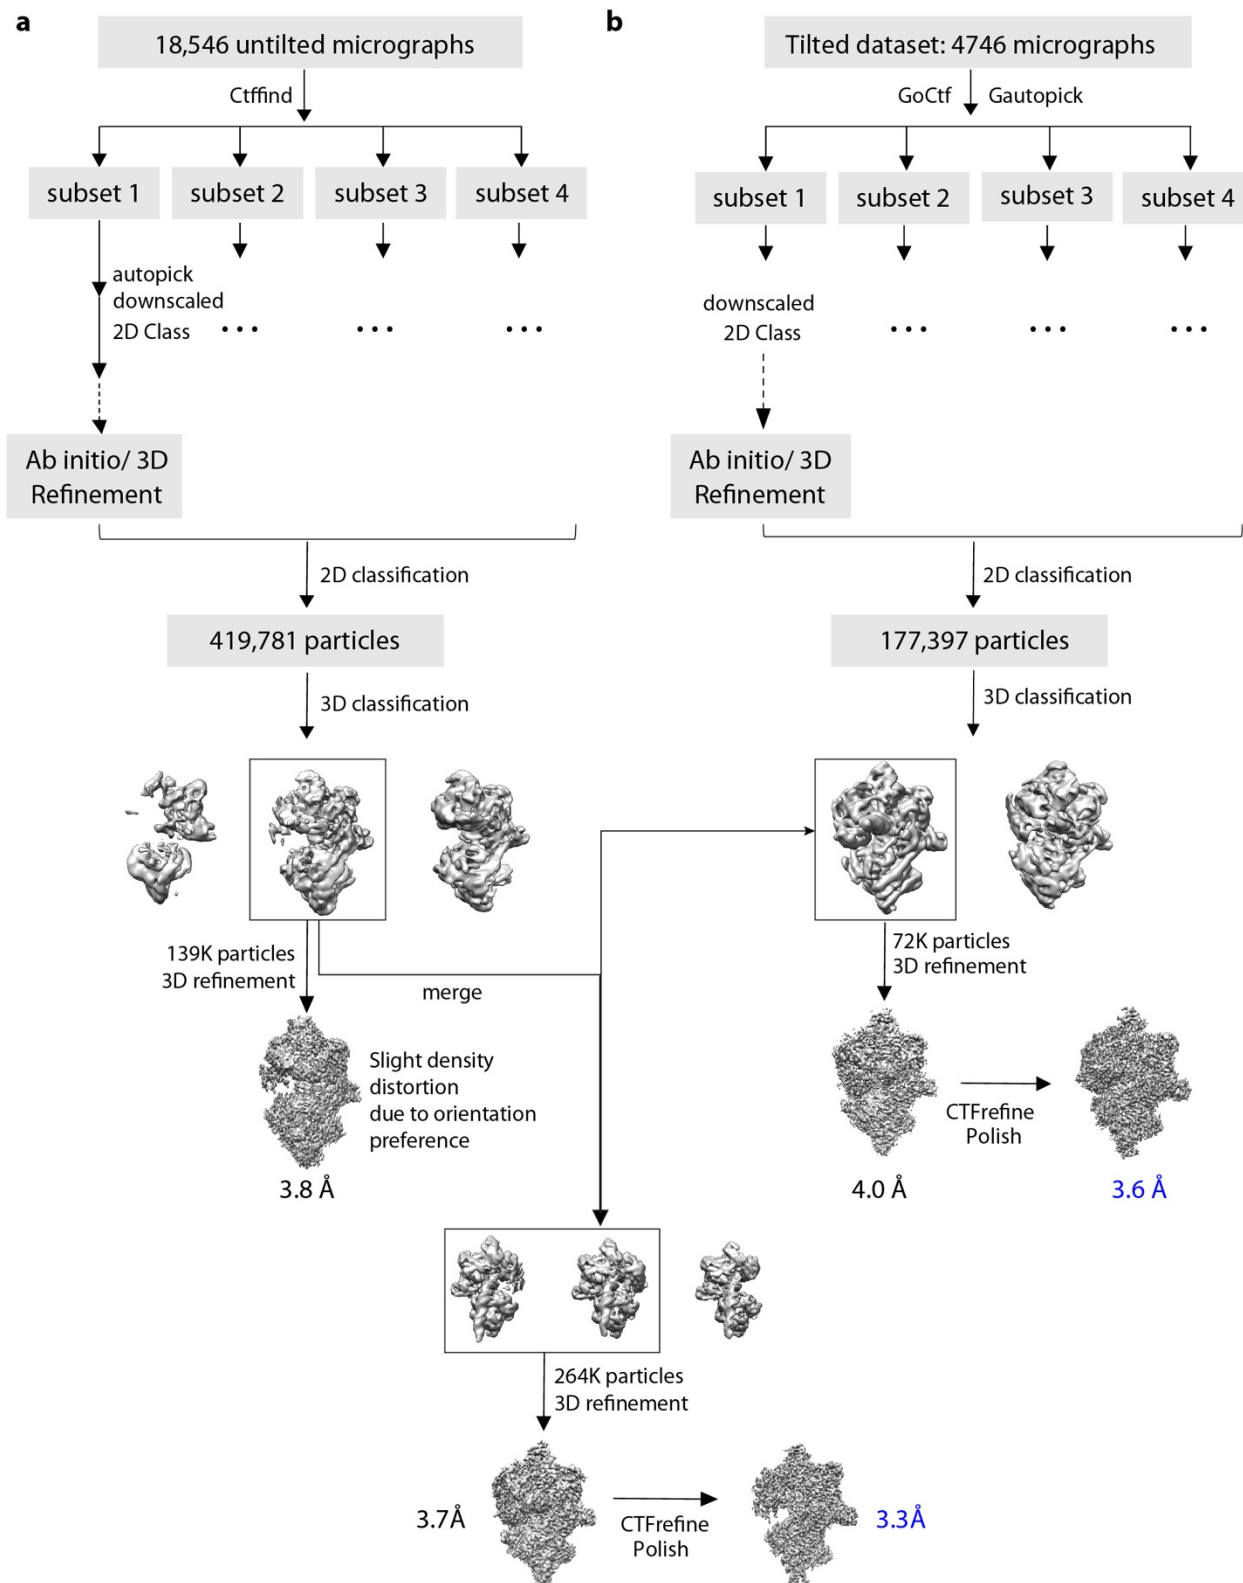

**Supplementary Figure 2. Image processing procedure of the untitled and tilted datasets, leading to two final 3D maps at 3.3-Å and 3.6-Å resolution, respectively.**

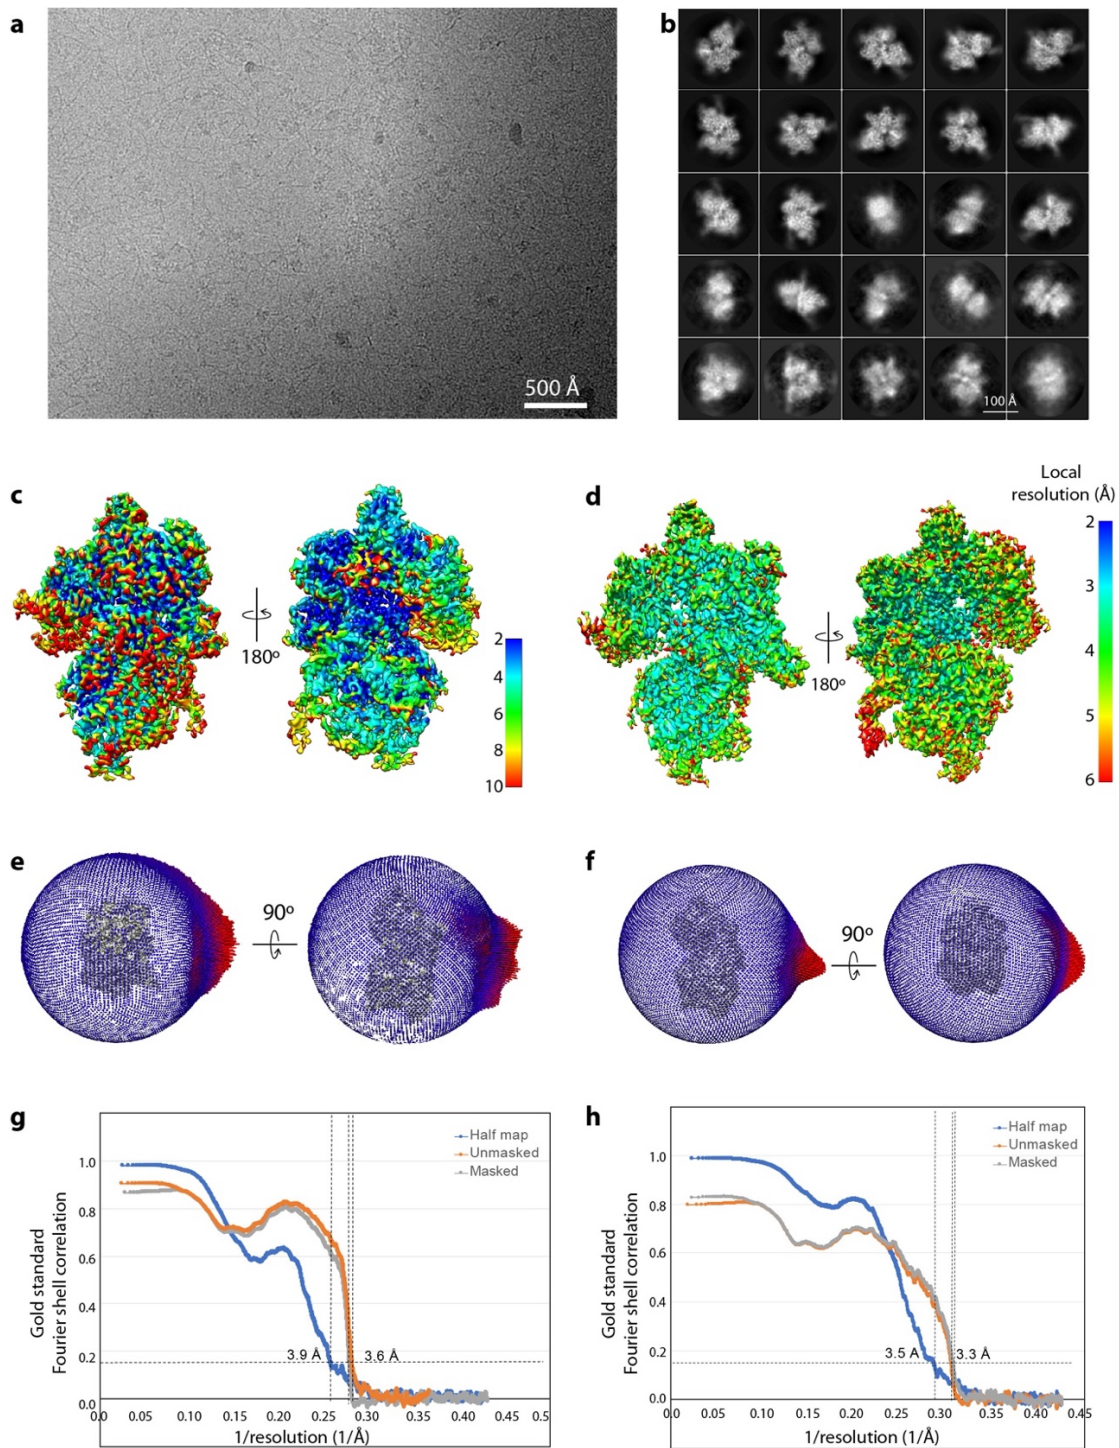

**Supplementary Figure 3. Cryo-EM 3D reconstruction.** **a)** A typical raw image. A total of 23,292 raw micrographs were recorded. **b)** The 2D class averages of the tilted dataset. **c)** The local resolution of the 3.6-Å 3D map. **d)** The local resolution of the 3.3-Å 3D map. **e)** The angular distribution of the 3.6-Å map. **f)** The angular distribution of the 3.3-Å map. **g)** The FSC curves of the 3.6-Å map. **h)** The FSC curve of the 3.3-Å map.

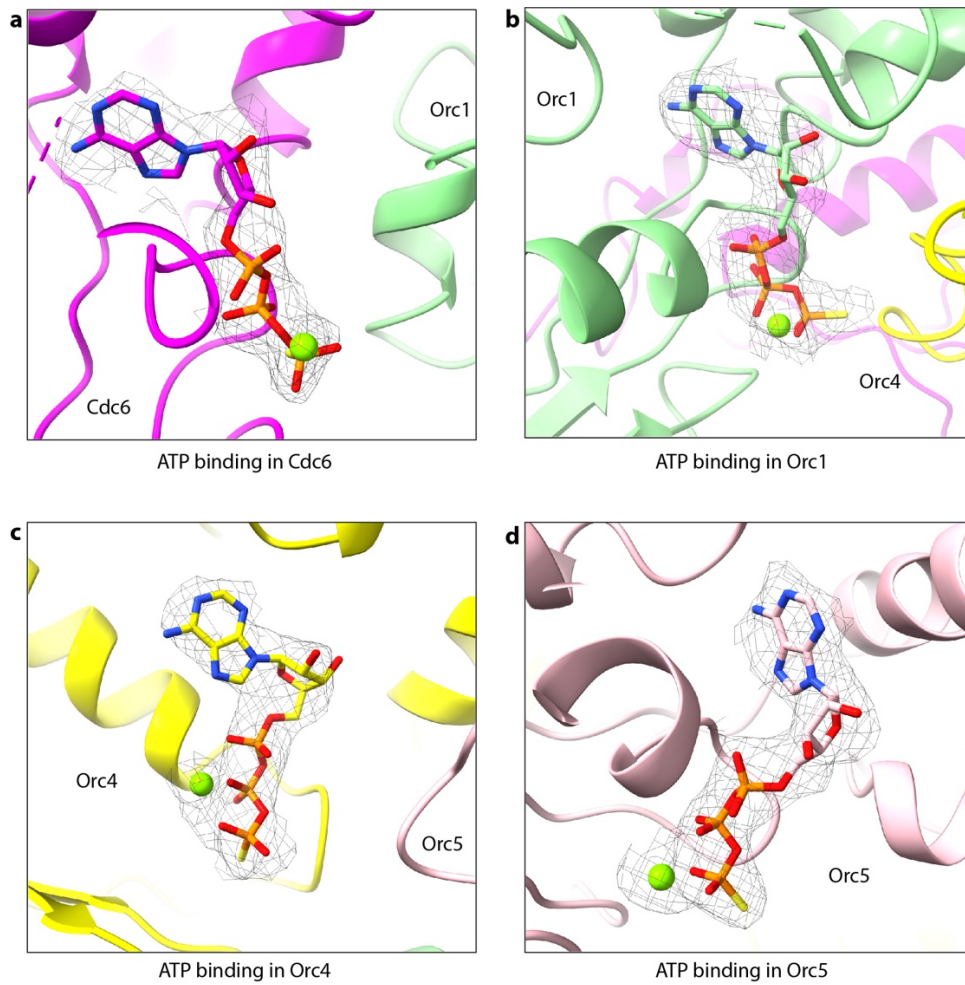

**Supplementary Figure 4. The binding pockets for ATP $\gamma$ S in Cdc6 (a), Orc1 (b), Orc4 (c), and Orc5 (d). The bound nucleotide density is superimposed on the atomic model.**



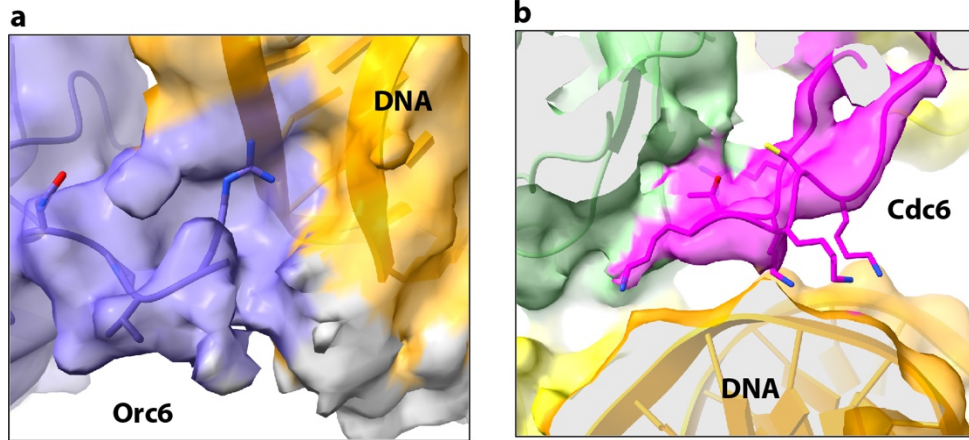

**Supplementary Figure 5. Two additional DNA binding sites in the ORC–Cdc6 structure that do not exist in the ORC alone structure. a)** The Orc6 basic patch interacts with DNA. **b)** The hairpin loop in the Cdc6 WHD interacts with DNA. The 3D map of ORC–Cdc6–DNA was low-pass-filtered to 4.0 Å resolution to increase the density connectivity and is rendered in surface view.

sp/P09119|CDC6\_YEAST

1

```

sp|P09119|CDC6_YEAST   MSAL...
tr|Q9VSM9|Q9VSM9_DROME MAVVF...
sp|Q99741|CDC6_HUMAN   MPQTF...
sp|O89033|CDC6_MOUSE   MPQTF...

```

sp/P09119|CDC6\_YEAST

10

```

sp|P09119|CDC6_YEAST   ...
tr|Q9VSM9|Q9VSM9_DROME TS.FVSENNENNRV...
sp|Q99741|CDC6_HUMAN   NKARN...
sp|O89033|CDC6_MOUSE   RK.PN...

```

sp/P09119|CDC6\_YEAST

20

30

```

sp|P09119|CDC6_YEAST   NLEDD...
tr|Q9VSM9|Q9VSM9_DROME ENREA...
sp|Q99741|CDC6_HUMAN   DNLCT...
sp|O89033|CDC6_MOUSE   DNLCT...

```

sp/P09119|CDC6\_YEAST

40

```

sp|P09119|CDC6_YEAST   ...
tr|Q9VSM9|Q9VSM9_DROME R...
sp|Q99741|CDC6_HUMAN   ELARV...
sp|O89033|CDC6_MOUSE   EODPR...

```

sp/P09119|CDC6\_YEAST

$\alpha 1$

```

sp|P09119|CDC6_YEAST   ...
tr|Q9VSM9|Q9VSM9_DROME NIQTN...
sp|Q99741|CDC6_HUMAN   ..PLK...
sp|O89033|CDC6_MOUSE   ..PPE...

```

sp/P09119|CDC6\_YEAST

$\beta 1$

$\alpha 2$

```

sp|P09119|CDC6_YEAST   ...
tr|Q9VSM9|Q9VSM9_DROME CSLY...
sp|Q99741|CDC6_HUMAN   CSLY...
sp|O89033|CDC6_MOUSE   CSLY...

```

sp/P09119|CDC6\_YEAST

$\beta 2$

$\alpha 3$

```

sp|P09119|CDC6_YEAST   ...
tr|Q9VSM9|Q9VSM9_DROME LFSVA...
sp|Q99741|CDC6_HUMAN   LKGF...
sp|O89033|CDC6_MOUSE   VKGF...

```

sp/P09119|CDC6\_YEAST

$\beta 3$

$\alpha 4$

$\beta 4$

```

sp|P09119|CDC6_YEAST   ...
tr|Q9VSM9|Q9VSM9_DROME IVDL...
sp|Q99741|CDC6_HUMAN   IVDL...
sp|O89033|CDC6_MOUSE   IVDL...

```

sp/P09119|CDC6\_YEAST

$\alpha 5$

$\alpha 6$

$\alpha 7$

```

sp|P09119|CDC6_YEAST   ...
tr|Q9VSM9|Q9VSM9_DROME ELK...
sp|Q99741|CDC6_HUMAN   KCK...
sp|O89033|CDC6_MOUSE   NCK...

```

sp/P09119|CDC6\_YEAST

$\alpha 8$

$\alpha 8$

```

sp|P09119|CDC6_YEAST   ...
tr|Q9VSM9|Q9VSM9_DROME RST...
sp|Q99741|CDC6_HUMAN   RRA...
sp|O89033|CDC6_MOUSE   RRA...

```



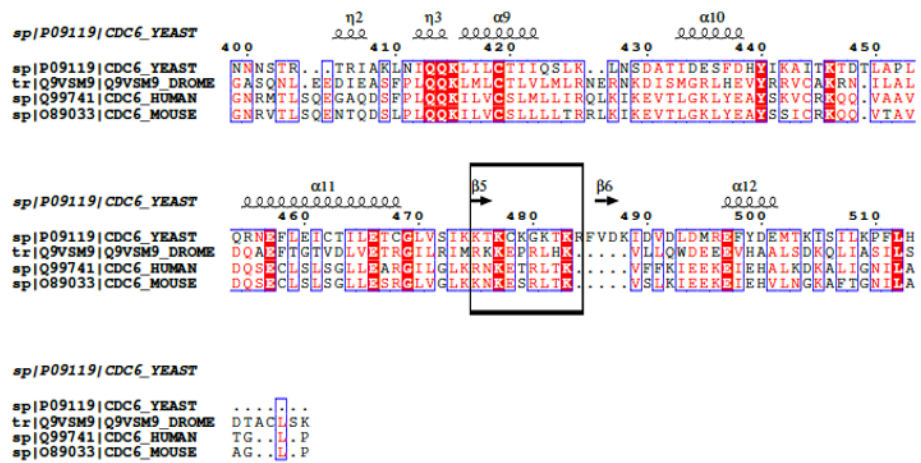

**Supplementary Figure 6. Sequence alignment of Cdc6.** Cdc6 sequences of *S. cerevisiae*, *Drosophila melanogaster*, human, and mouse were aligned by T-COFFEE and further analyzed by ESPrnt3.0. The region shown in Fig. 2d is highlighted by a black square box.

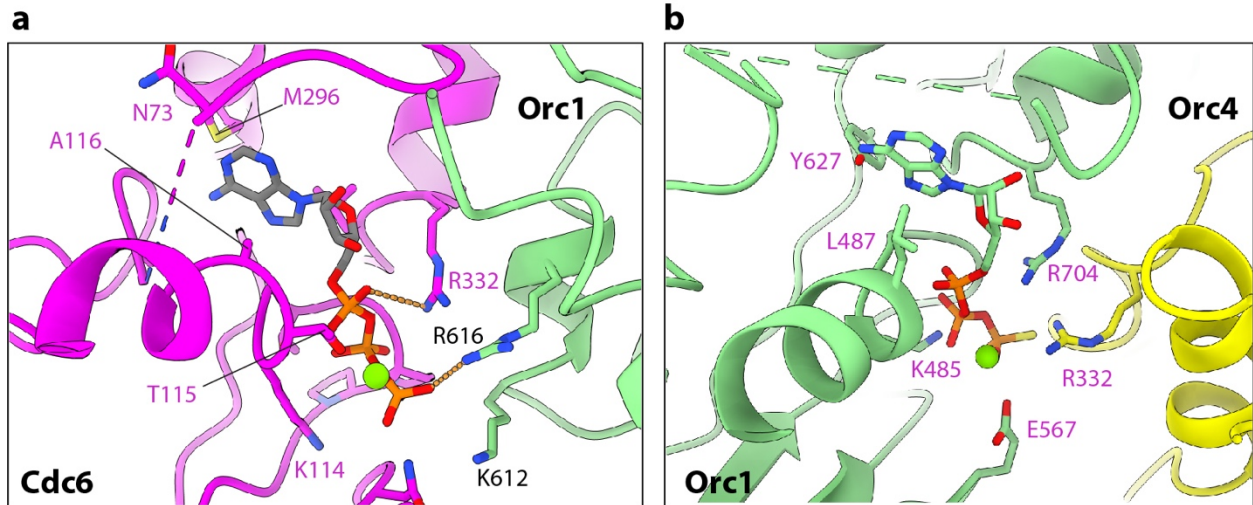

**Supplementary Figure 7. Comparing the ATP $\gamma$ S binding pockets of Cdc6 (a) and Orc1 (b). ATP $\gamma$ S and the interacting residues are shown as sticks.**
